# Supplementary material for: Exploring electrochemically prepared carbon dot post-treatments with amphiphilic and nonamphiphilic surfactants
Source: Royal Society of Chemistry journal article supplement (doi:10.1039/d4nj01073f), 2024-01-01
Supplement: d4nj01073f1.pdf [file d4nj01073f1.pdf]

## Supplementary Information

### Exploring nonamphiphilic stabilizers as replacement of amphiphilic surfactants for electrochemically synthesized carbon dots

Michal Sobota<sup>1</sup>, Soha Ahmadi<sup>2</sup>, Navina Lotay<sup>2</sup>, Michael Thompson<sup>2\*</sup> and Martin Weis<sup>1</sup>

<sup>1</sup> Faculty of Electrical Engineering and Information Technology of STU in Bratislava, Ilkovičova 2961, 841 04 Bratislava, Slovakia; xsobota@stuba.sk (M.S.), martin.weis@stuba.sk (M.W.)

<sup>2</sup> Department of Chemistry, University of Toronto, 80 St George St, Toronto, ON M5S 3H6, Canada; so-ha.ahmadi@mail.utoronto.ca (S.A.); navina.lotay@mail.utoronto.ca (N.L.); m.thompson@utoronto.ca (M.T.)

\* Correspondence: m.thompson@utoronto.ca (M.T.)

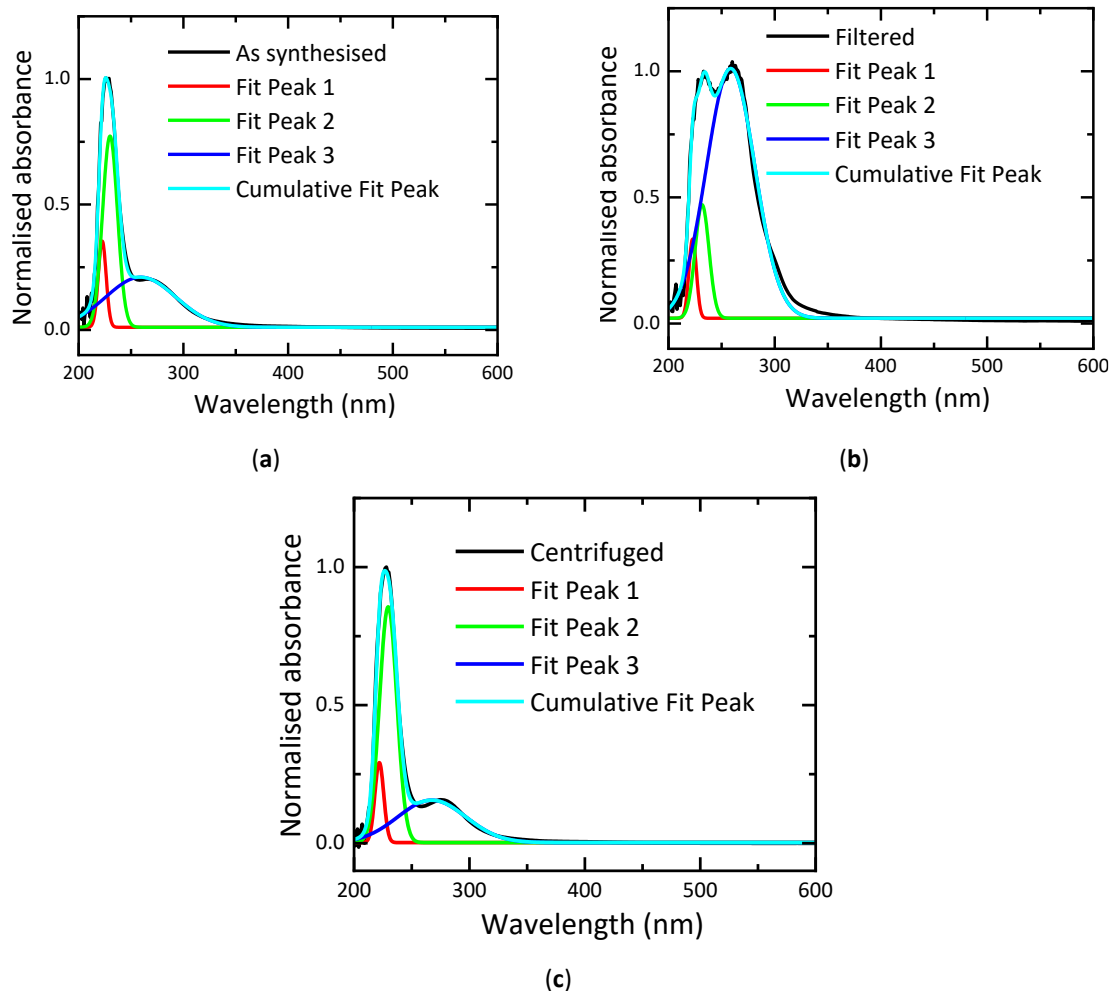

Fig. S1 Normed absorbance deconvolution of CD-X (a) As-synthesized, (b) filtered, and (c) centrifuged.

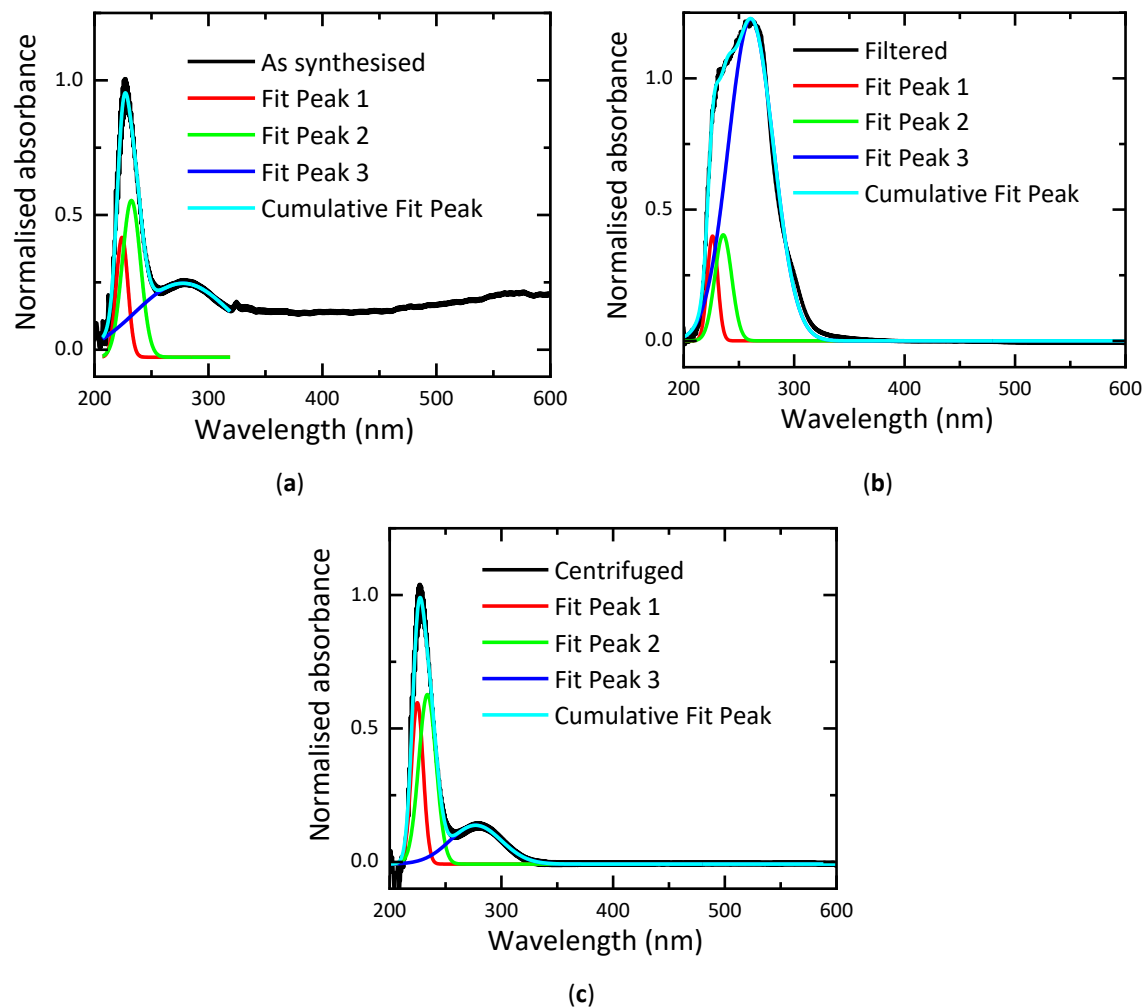

Fig. S2 Normed absorbance deconvolution of CD-Na (a) As-synthesized, (b) filtered, and (c) centrifuged.

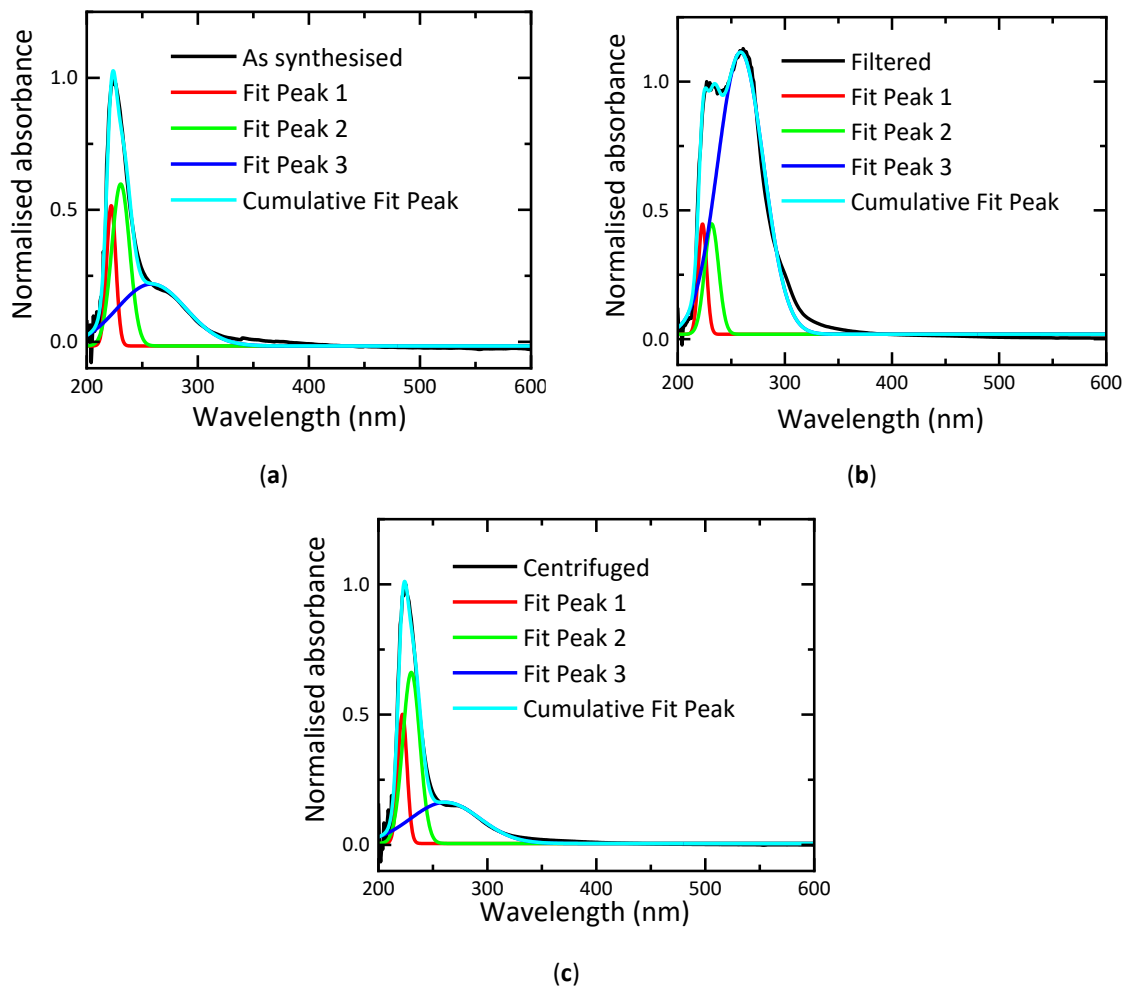

**Fig. S3** Normed absorbance deconvolution of CD-SDS (a) As-synthesized, (b) filtered, and (c) centrifuged.

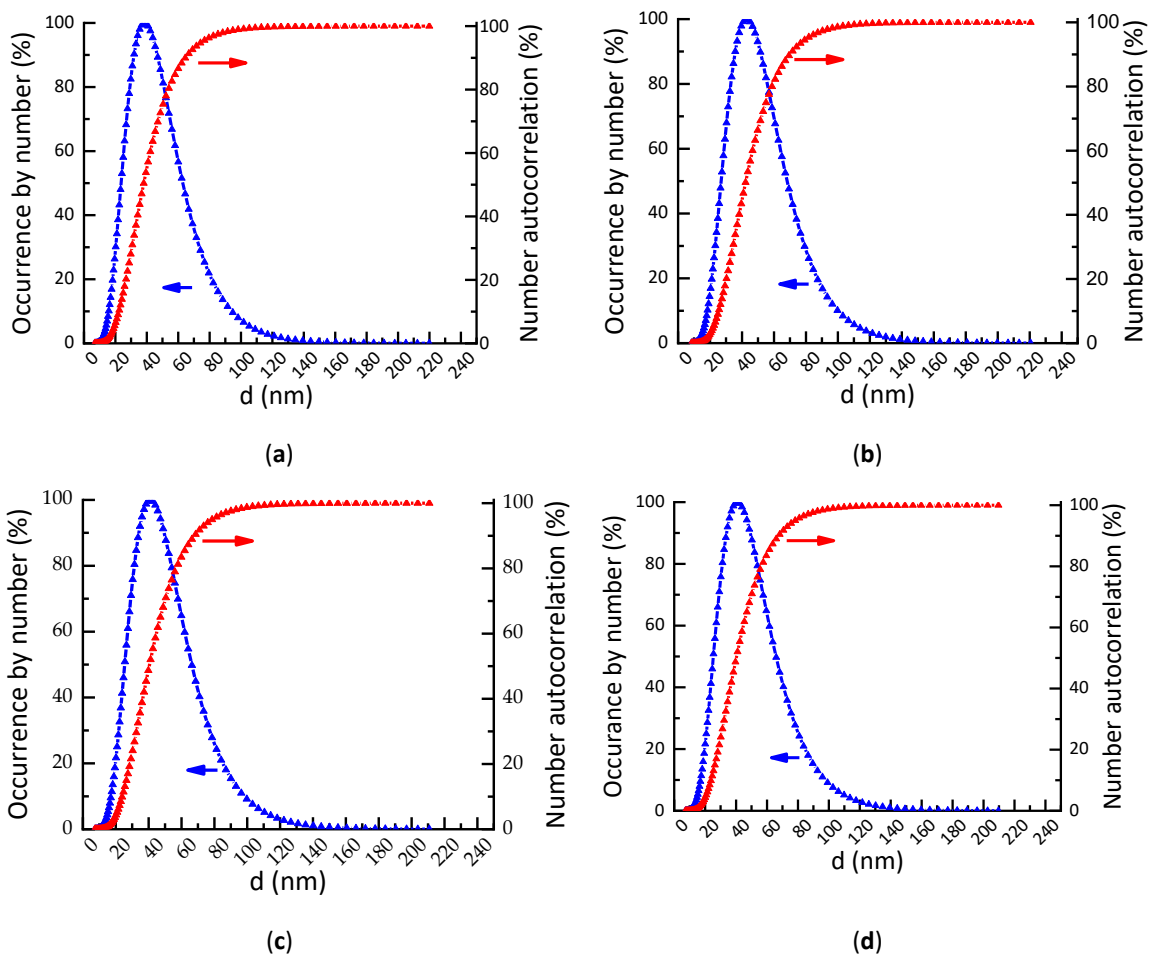

**Fig. S4** DLS of CD-X centrifuged, 4 separate runs (a), (b), (c), and (d).

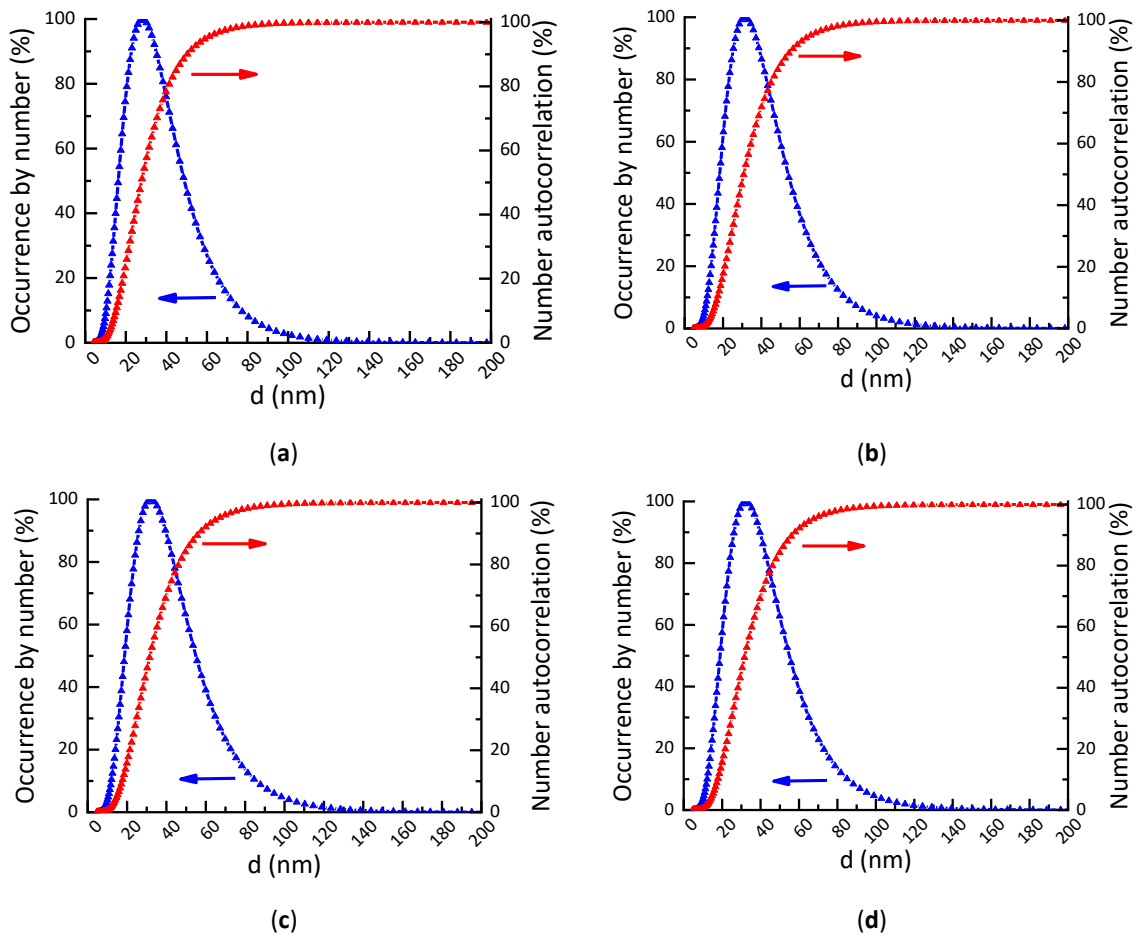

**Fig. S5** DLS of CD-X filtered, 4 separate runs (a), (b), (c), and (d).

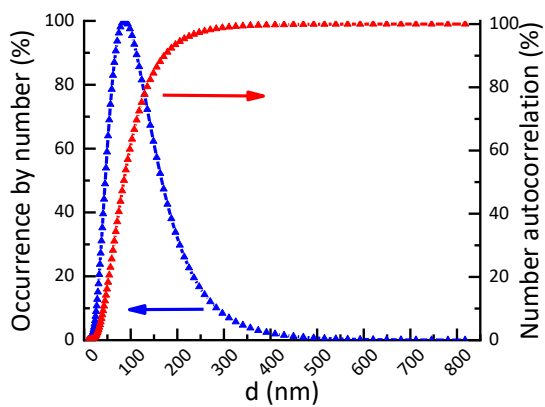

(a)

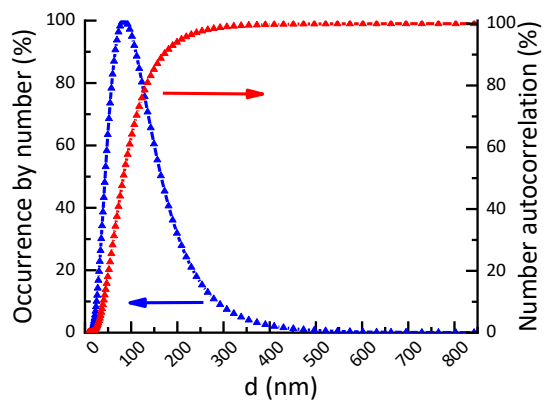

(b)

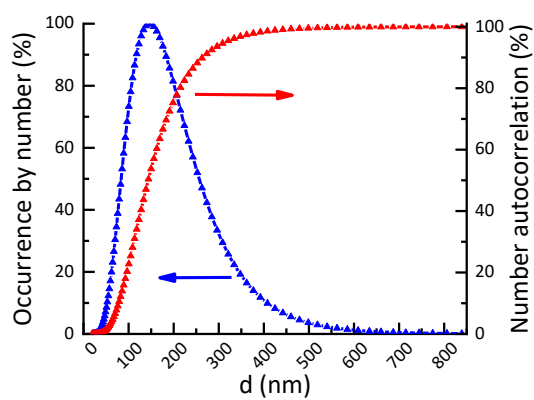

(c)

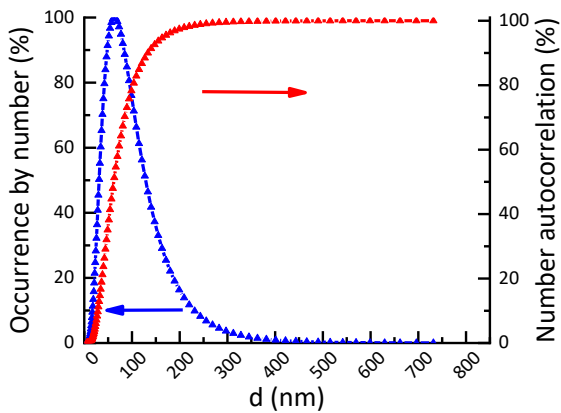

(d)

**Fig. S6** DLS of CD-Na centrifuged, 4 separate runs (a), (b), (c), and (d).

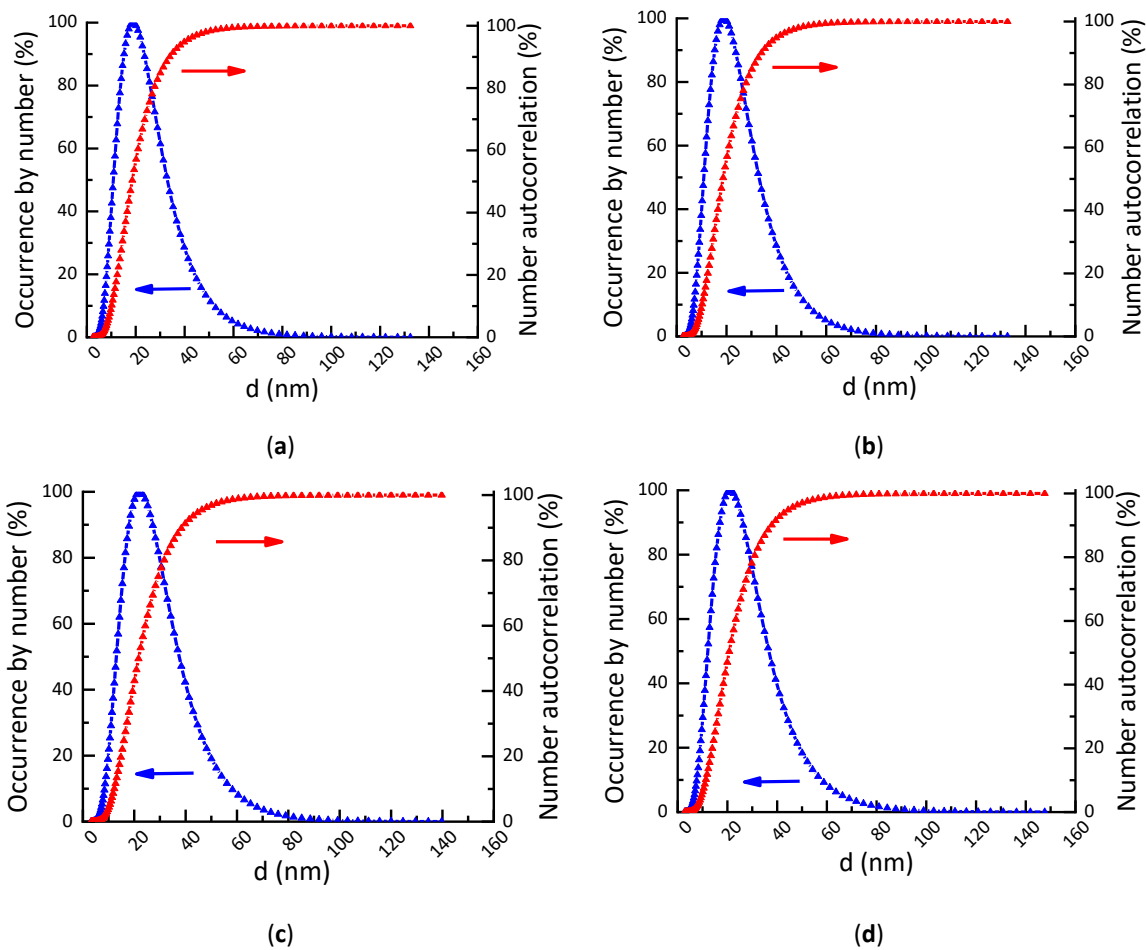

Fig. S7 DLS of CD-Na filtered 4 separate runs (a), (b), (c), and (d).

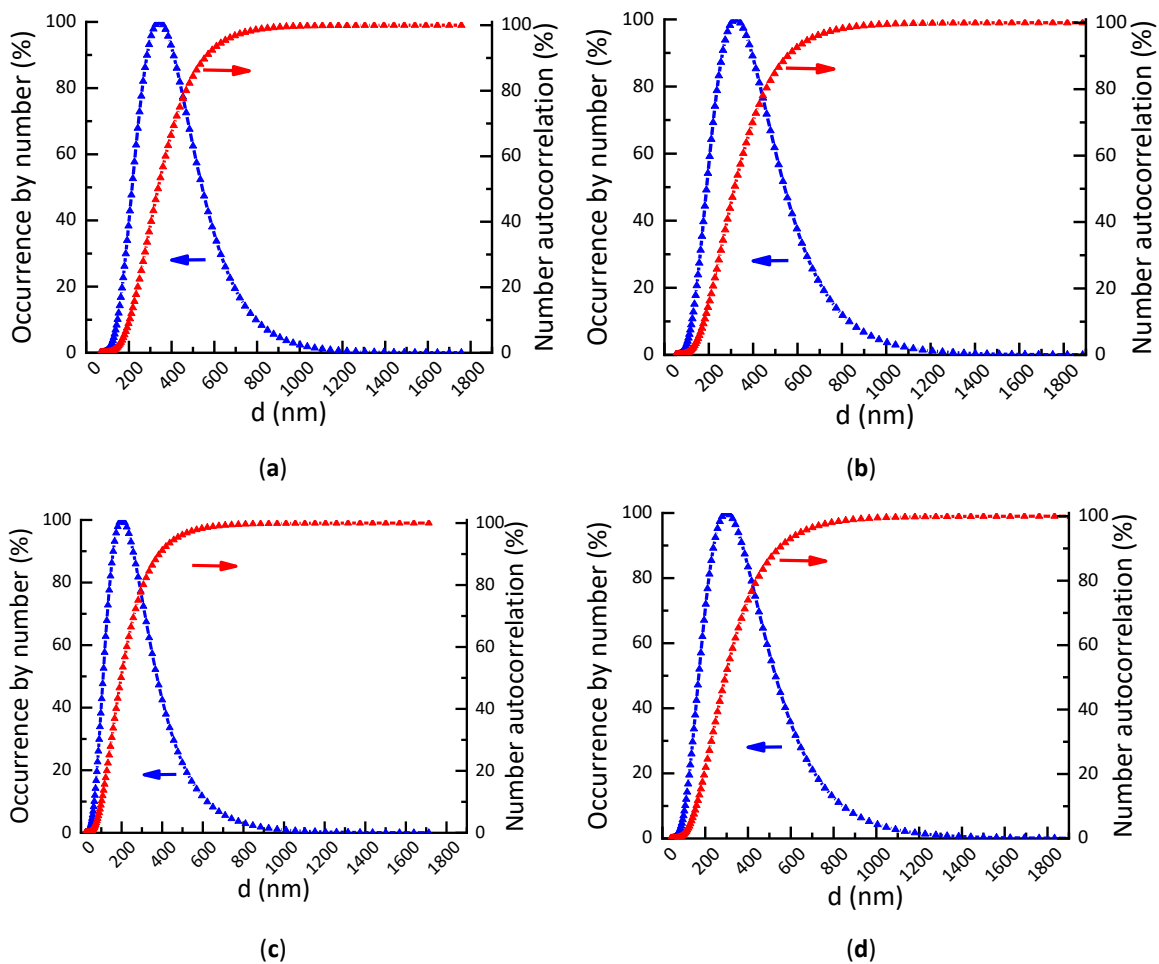

**Fig. S8** DLS of CD-SDS centrifuged, 4 separate runs (a), (b), (c), and (d).



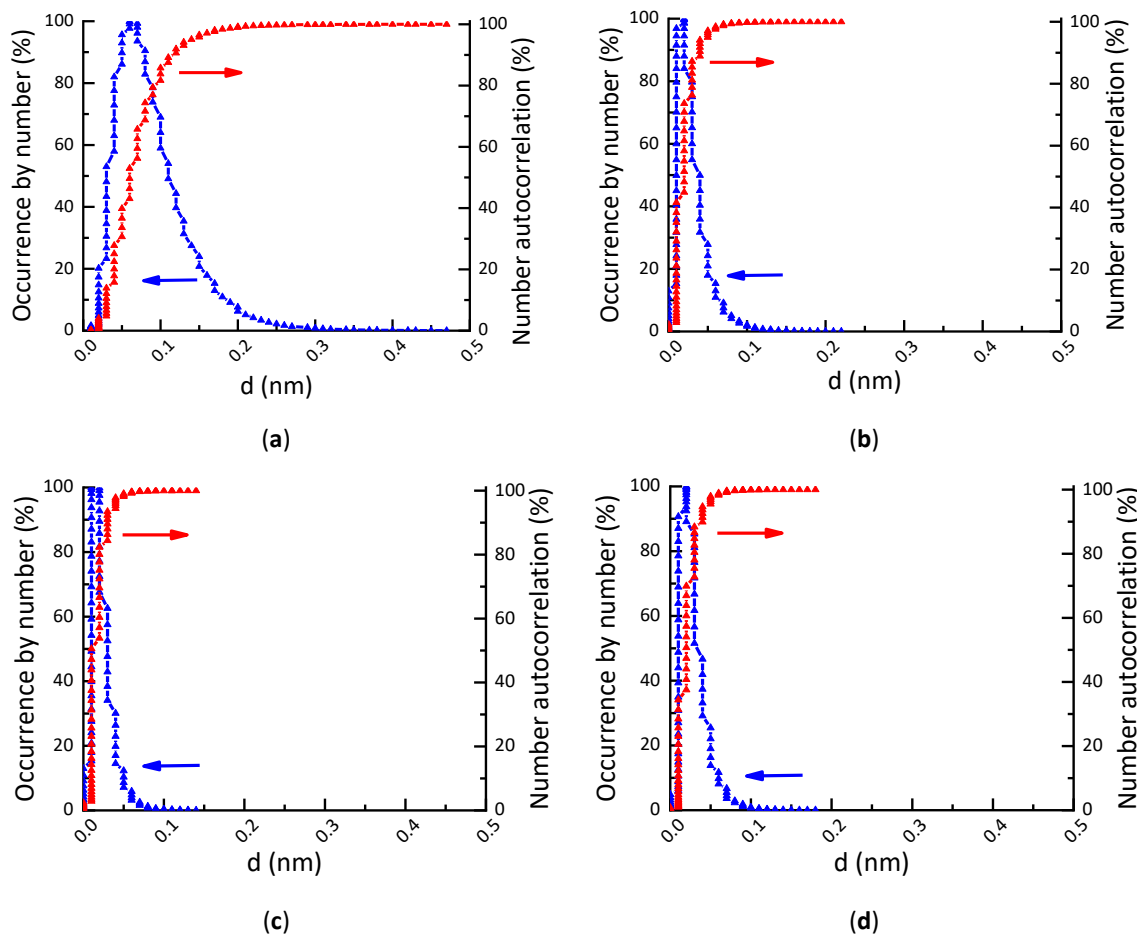

**Fig. S9** DLS of CD-SDS filtered, 4 separate runs (a), (b), (c), and (d).

**Table S1** Comparison of the average polydispersity index for CD solutions after centrifugation and post-treatment filtration.

| CD sample | Polydispersity index (-) |          |
|-----------|--------------------------|----------|
|           | centrifuged              | filtered |
| CD-X      | 0.20                     | 0.25     |
| CD-Na     | 0.38                     | 0.26     |
| CD-SDS    | 0.26                     | *        |

\* Concentration too low for reliable evaluation.

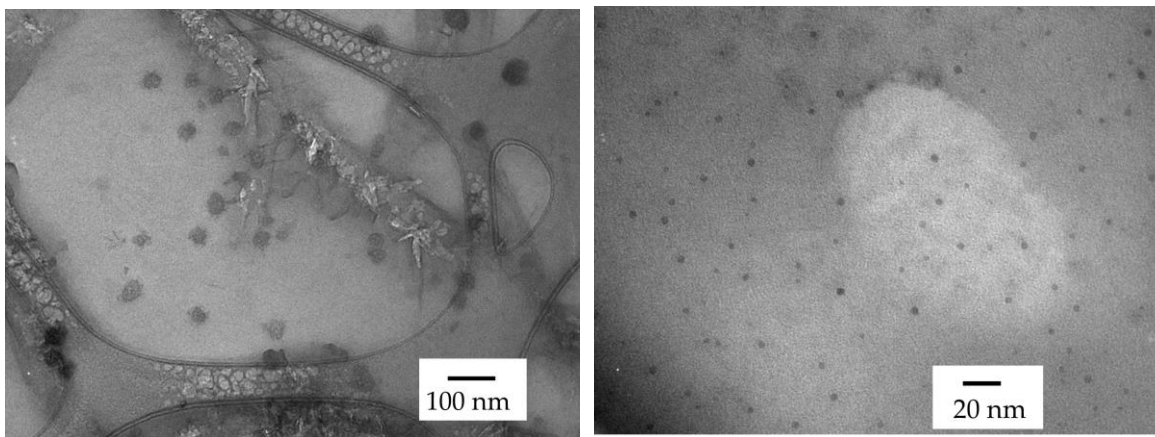

(a)

(b)

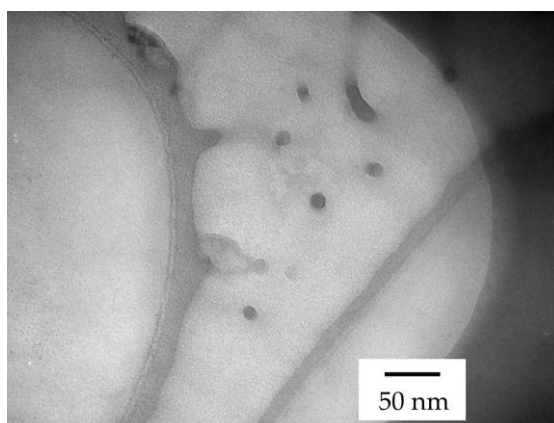

(c)

**Fig. S10** Higher magnification TEMs of a) CD-X, b) CD-Na, and c) CD-SDS filtered.

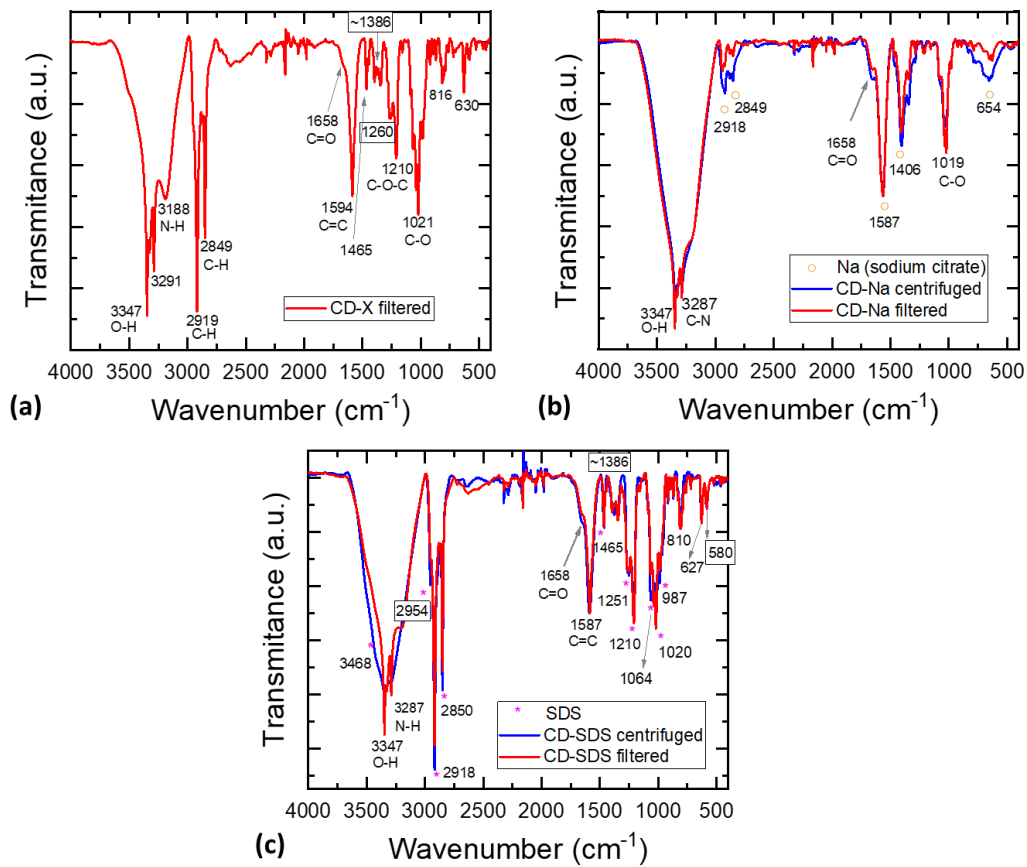

Fig. S11 FTIR of (a) CD-X filtered, (b) CD-Na, and (c) CD-SDS an ATR setup.

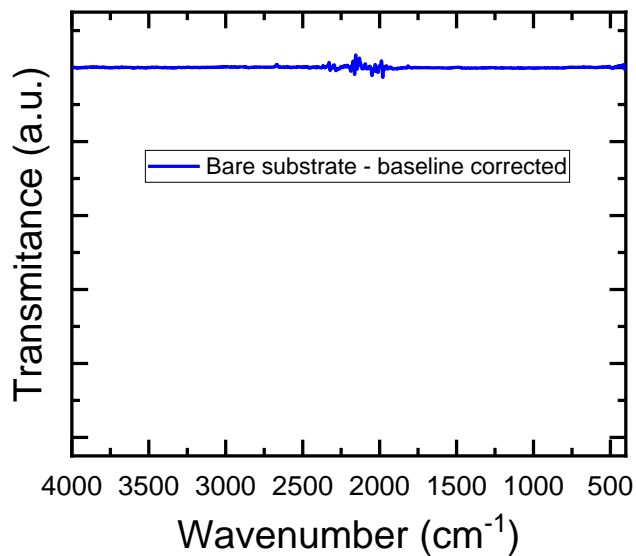

Fig. S12 FTIR of pure stainless-steel substrate in an ATR setup

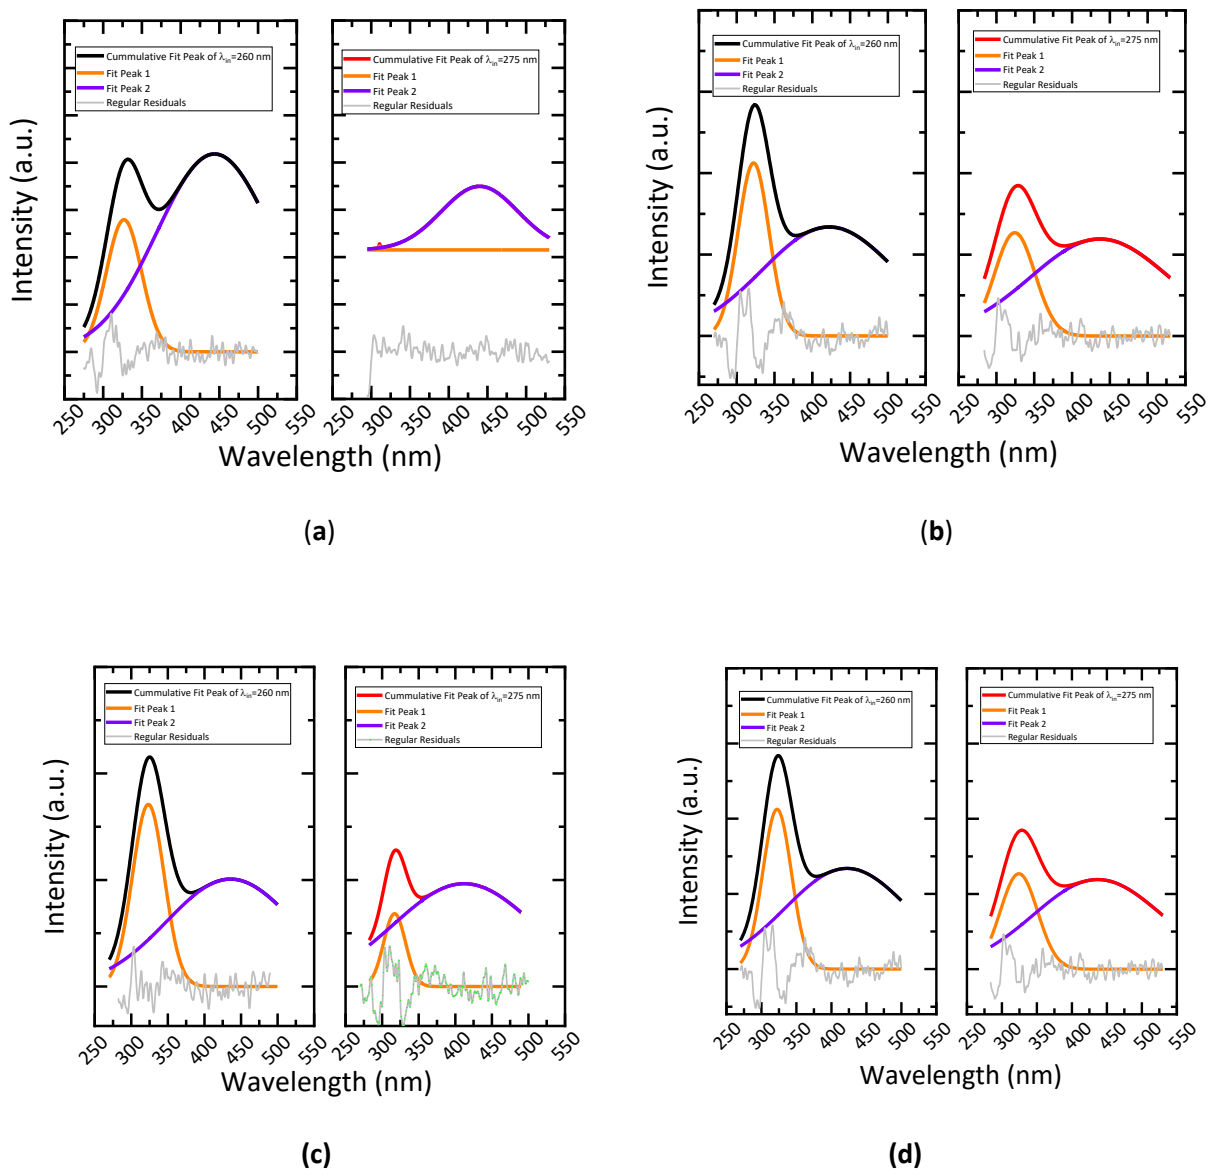

**Fig. S13** (a) Fluorescence spectra deconvolution of centrifuged CD-SDS, (b) filtered CD-SDS, (c) filtered CD-X, and (d) filtered CD-Na. For centrifuged CD-SDS, Cumulative Fit Peak is almost identical to Fit Peak 2.
